# Supplementary material for: An automated screening platform for improving the responsiveness of genetically encoded Ca2+ biosensors in mammalian cells
Source: Royal Society of Chemistry journal article supplement (doi:10.1039/d4sd00138a), 2024-01-01
Supplement: d4sd00138a1.pdf [file d4sd00138a1.pdf]

## Electronic Supplementary information

### **An automated screening platform for improving the performance of genetically encoded Ca<sup>2+</sup> biosensors in mammalian cells**

Yufeng Zhao<sup>1, 2, 3\*</sup>, Yi Shen<sup>1</sup>, Teodor Veres<sup>2, 4</sup>, Robert E. Campbell<sup>1, 5, 6\*</sup>

1. Department of Chemistry, University of Alberta, Edmonton, Alberta T6G 2G2, Canada
2. Centre for Research and Applications in Fluidic Technologies, National Research Council of Canada, Toronto, Ontario M5S 3G8, Canada
3. Leslie Dan Faculty of Pharmacy, University of Toronto, Toronto, Ontario M5S 3M2, Canada
4. Medical Devices Research Center, Life Sciences Division, National Research Council of Canada, Boucherville, QC J4B 6Y4, Canada
5. Department of Chemistry, Graduate School of Science, The University of Tokyo, Tokyo 113-0033, Japan
6. CERVO Brain Research Center and Department of Biochemistry, Microbiology, and Bioinformatics, Université Laval, Québec, Québec G1V 0A6, Canada

## Supplementary figures

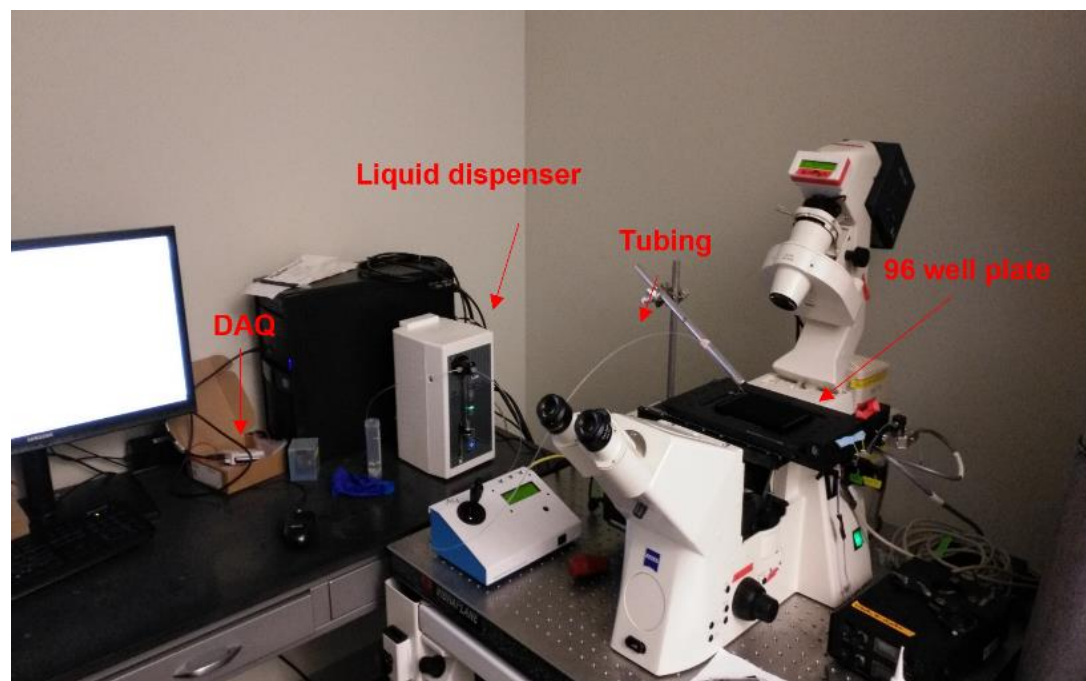

**Figure S1.** Experimental setup of the screening platform.

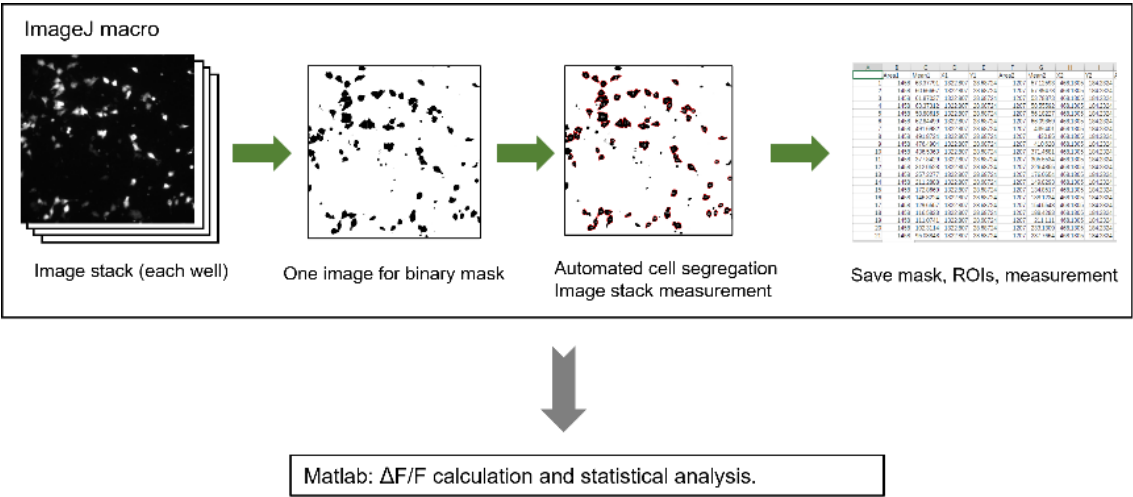

**Figure S2.** Schematic work flow of the image analysis.

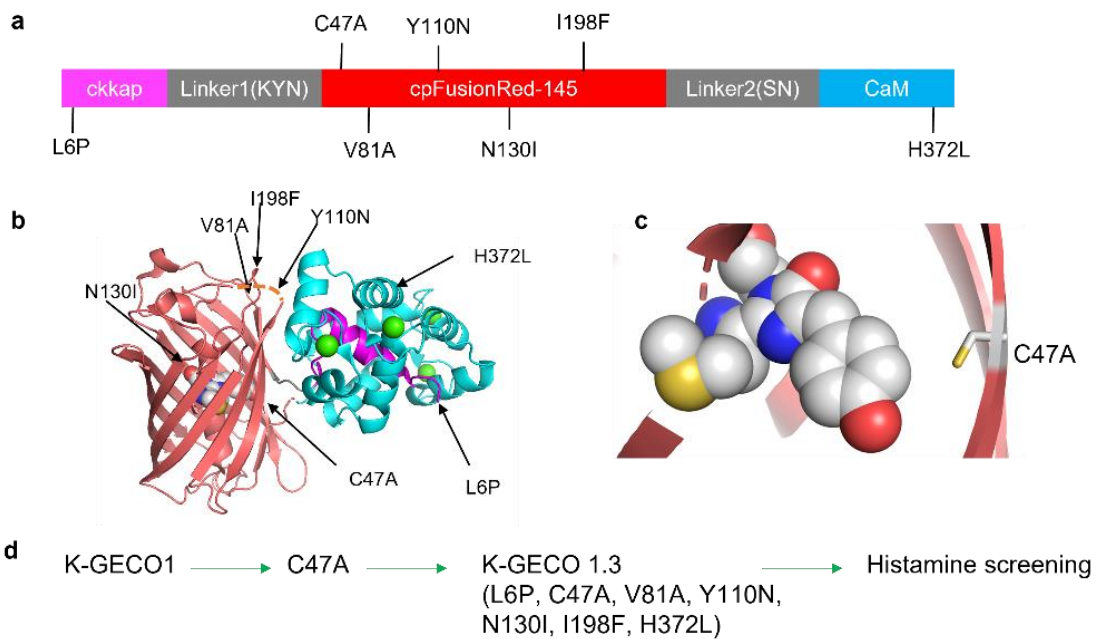

**Figure S3.** Initial evolution of K-GECO1. (a) Schematic and (b) crystal structure (PDB ID:5UKG) of K-GECO1 labeled with mutations of K-GECO1.3. (c) Chromophore and C47 of K-GECO1. (d) Evolution trajectory from K-GECO1 to K-GECO1.3.

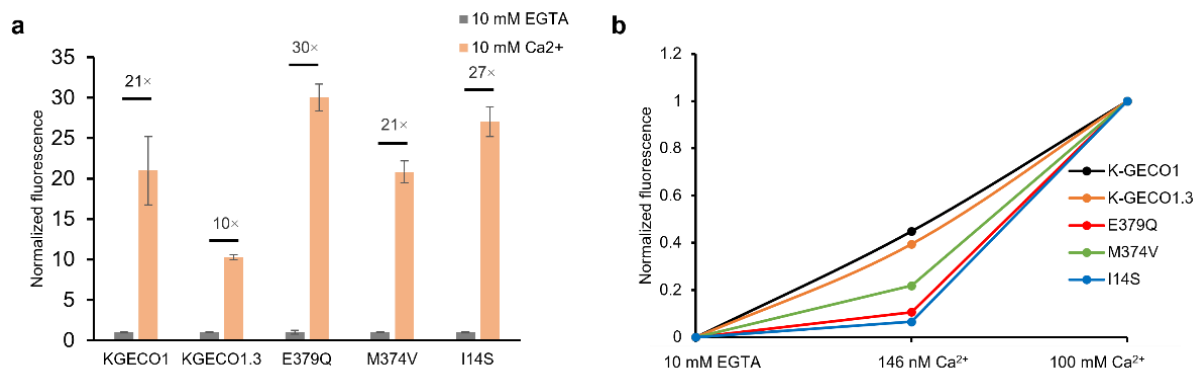

**Figure S4.** Dynamic range (a) and affinity (b) of K-GECO variants in bacterial lysates. Error bars represent standard deviation.

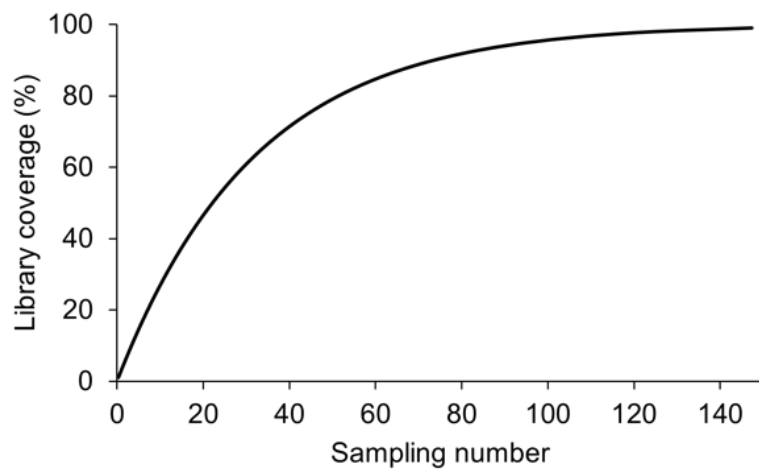

**Figure S5.** Library coverage at different sampling number in a single position NNK library.
